# Supplementary material
Source: publisher site journal article supplement (https://www.spandidos-publications.com/6545/downloadSupplementary)
Supplement: Supplementary file 1 [file downloadSupplementary]

**Table SI.** Association between clinical factors and p53-specific IL-10 production.

| Characteristic            | p53-specific IL-10 production |            | P-value | MAGE-A4-specific IL-10 production |            | P-value |
|---------------------------|-------------------------------|------------|---------|-----------------------------------|------------|---------|
|                           | Positive                      | Negative   |         | Positive                          | Negative   |         |
| Median age, years (range) | 64 (57-77)                    | 63 (48-76) | 0.7140  | 62 (48-74)                        | 72 (62-77) | 0.1030  |
| Primary site              |                               |            | 0.8425  |                                   |            | 0.4966  |
| Larynx                    | 3                             | 3          |         | 2                                 | 3          |         |
| Oropharynx                | 3                             | 2          |         | 3                                 | 1          |         |
| Hypopharynx               | 3                             | 4          |         | 2                                 | 3          |         |
| T stage                   |                               |            | 0.5765  |                                   |            | >0.9999 |
| T1-2                      | 3                             | 1          |         | 2                                 | 1          |         |
| T3-4                      | 6                             | 8          |         | 5                                 | 6          |         |
| N stage                   |                               |            | >0.9999 |                                   |            | >0.9999 |
| N0                        | 3                             | 4          |         | 2                                 | 3          |         |
| N+                        | 6                             | 5          |         | 5                                 | 4          |         |

IL-10, interleukin-10.
